# Supplementary material for: Prevalence and Associated Factors of Bovine Mastitis on Small Holder Dairy Farms in and Around Arsi Negele, West Arsi Zone, Oromia Region, Ethiopia
Source: Research Square preprint supplement (doi:10.21203/rs.3.rs-8575705/v1), 2026-01-22
Supplement: Supplementary file 1 [file 0a1294547954eb8c98c06bfb.pdf]

## **Supplementary File**

### **Title: Prevalence and Associated Factors of Bovine Mastitis on Small Holder Dairy Farms in and Around Arsi Negele, West Arsi Zone, Oromia Region, Ethiopia**

#### **Farm Management and Risk Factor Assessment**

##### **Introduction**

This document was used during farm visits to collect information on potential risk factors associated with bovine mastitis. Data were obtained through informal interviews and on-site observation of smallholder dairy farms in and around Arsi Negele, Ethiopia.

##### **Section A: Farm Information**

1. Location of the farm (urban / peri-urban / rural)
2. Number of lactating cows currently in the farm
3. Type of production system (intensive / semi-intensive / extensive)
4. Type of housing (separate barn / shared housing / open yard)
5. Frequency of barn cleaning (daily / every 2–3 days / weekly / rarely)

##### **Section B: Cow-Level Information**

6. Age of the cow (years)
7. Parity number
8. Stage of lactation (early / mid / late)
9. History of mastitis in the current or previous lactations (yes / no)

### **Section C: Milking Practices**

- 10. Type of milking (hand milking / machine milking)
- 11. Number of milking per day
- 12. Udder washing before milking (yes / no)
- 13. Use of soap or disinfectant for udder washing (yes / no)
- 14. Use of common towel for multiple cows (yes / no)
- 15. Post-milking teat dipping practiced (yes / no)

### **Section D: Hygiene Assessment (Observed by Investigators)**

- 16. Hygienic condition of the farm (good / medium / poor)
- 17. Hygienic condition of udder (slightly dirty / moderately dirty / dirty)
- 18. Hygienic condition of hind legs (slightly dirty / moderately dirty / dirty)

### **Section E: Veterinary Care**

- 19. Access to veterinary services (yes / no)
- 20. Mastitis treatment previously given by veterinarian (yes / no)
- 21. Awareness of subclinical mastitis (yes / no)

**Title: Prevalence and Associated Factors of Bovine Mastitis on Small Holder Dairy Farms in and Around Arsi Negele, West Arsi Zone, Oromia Region, Ethiopia**

### Data Recording Format

[illegible]
